# Supplementary material for: Low-dimensional high entropy oxide (FeCoCrMnNi)3O4 for supercapacitor applications
Source: Royal Society of Chemistry journal article supplement (doi:10.1039/d3dt00909b), 2023-01-01
Supplement: d3dt00909b1.pdf [file d3dt00909b1.pdf]

## Supplementary Information

### Low Dimensional High Entropy Oxide (FeCoCrMnNi)<sub>3</sub>O<sub>4</sub> for Supercapacitor Application

Yi Yin <sup>a</sup>, Wei-Bin Zhang\* <sup>a</sup>, Xian-Li Zhang <sup>a</sup>, Myat Myintzu Theint <sup>a,b</sup>, Jing-Lei Yang <sup>a</sup>, Ze-Qin Yang <sup>a</sup>,  
Jia-Jun Li <sup>a</sup>, Shan Liang <sup>a</sup>, Xue-Jing Ma <sup>a</sup>

<sup>a</sup> College of Materials and Chemistry & Chemical Engineering, Chengdu University of Technology,  
Chengdu 610059, China

<sup>b</sup> Mineral Development Section for International Relation, Department of Mines and Ministry of  
Natural Resources and Environmental, Nay Pyi Taw 15011, Myanmar

\* Corresponding Author. E-mail: zhangweibin17@cdut.edu.cn

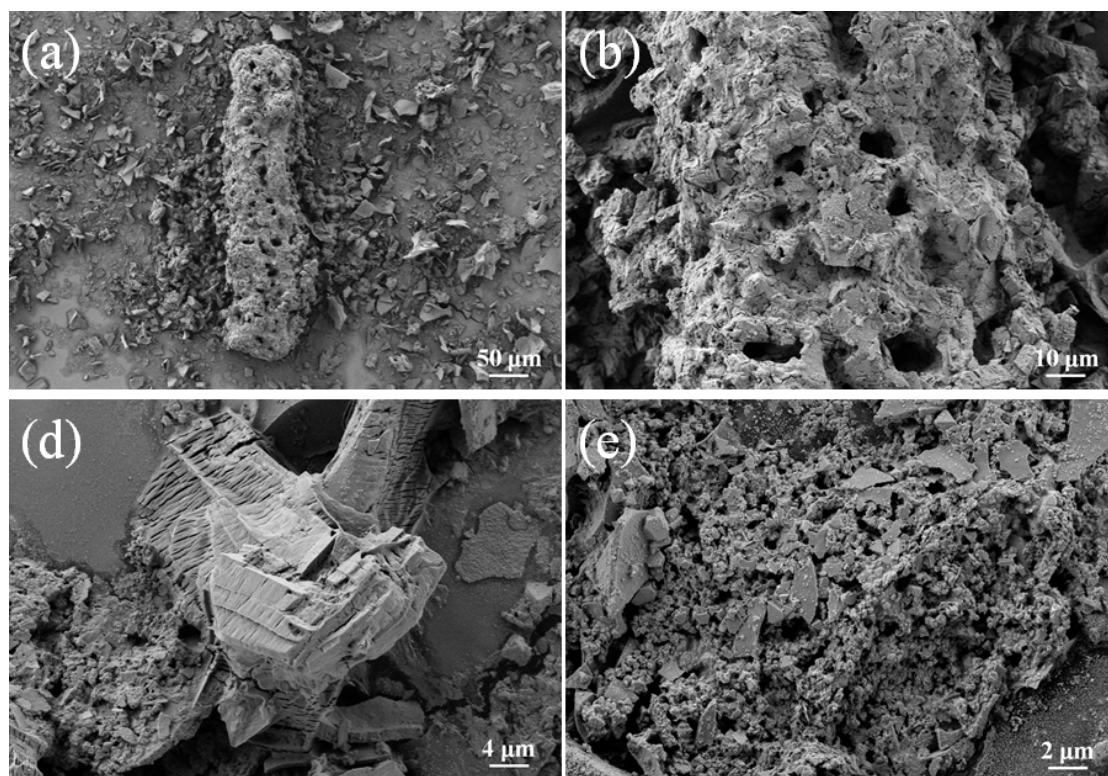

Fig. S1. The SEM images of other parts of the HEO-2. (a) and (d) SEM images at low magnification; (b) and (e) SEM images at high magnification.

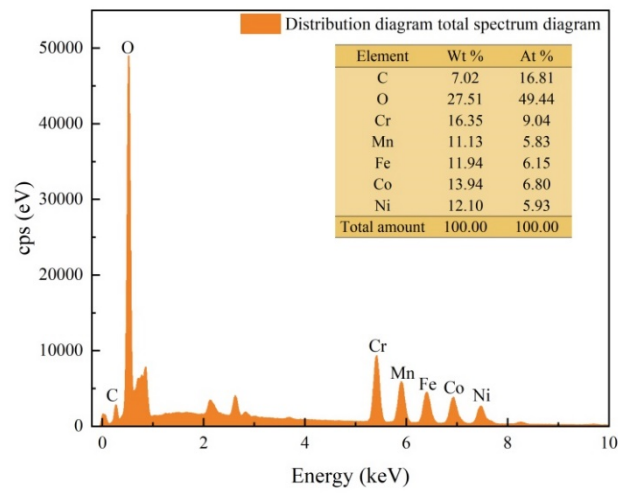

Fig. S2. The total spectrum of the distribution map of the HEO-2.

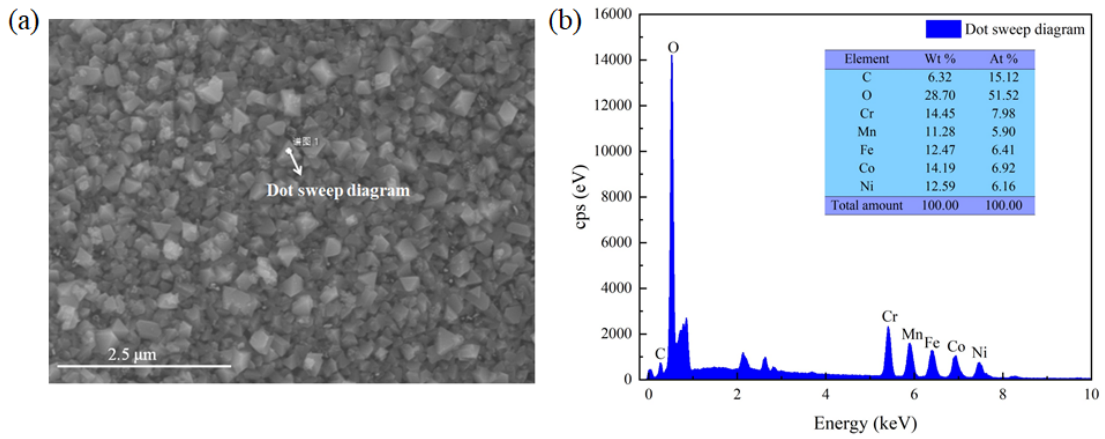

Fig. S3. The selected point on the HEO-2 which was scanned (a) The selected point on HEO-2. (b) Dot sweep diagram.

Dot sweep diagram.

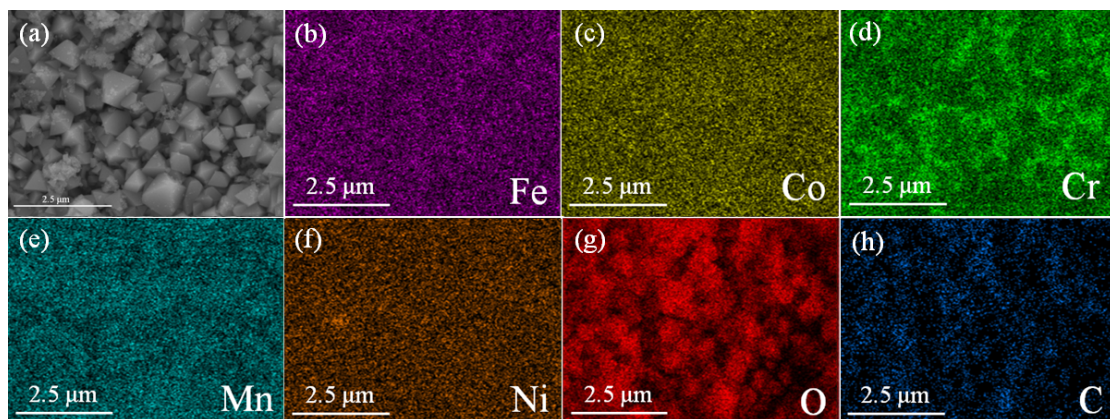

Fig. S4. Micromorphology of HEO-4 calcined at 600 °C. (a) HAADF image of selected area; (b-h) EDS mapping of element Fe, Co, Cr, Mn, Ni, O, C.

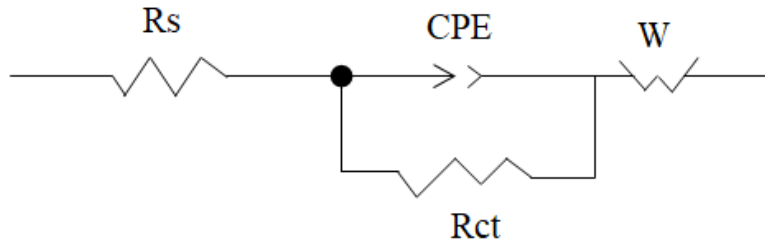

Fig. S5. Equivalent circuit fitting diagram.

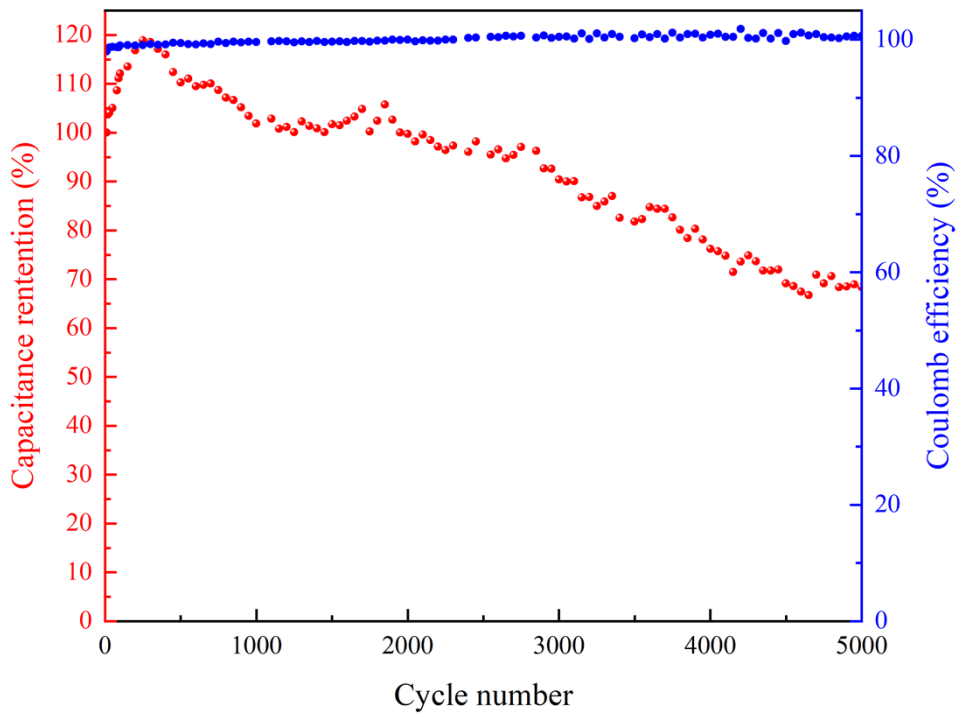

Fig. S6. Cycling stability and coulomb efficiency of HEO-2 after 5,000 cycles.

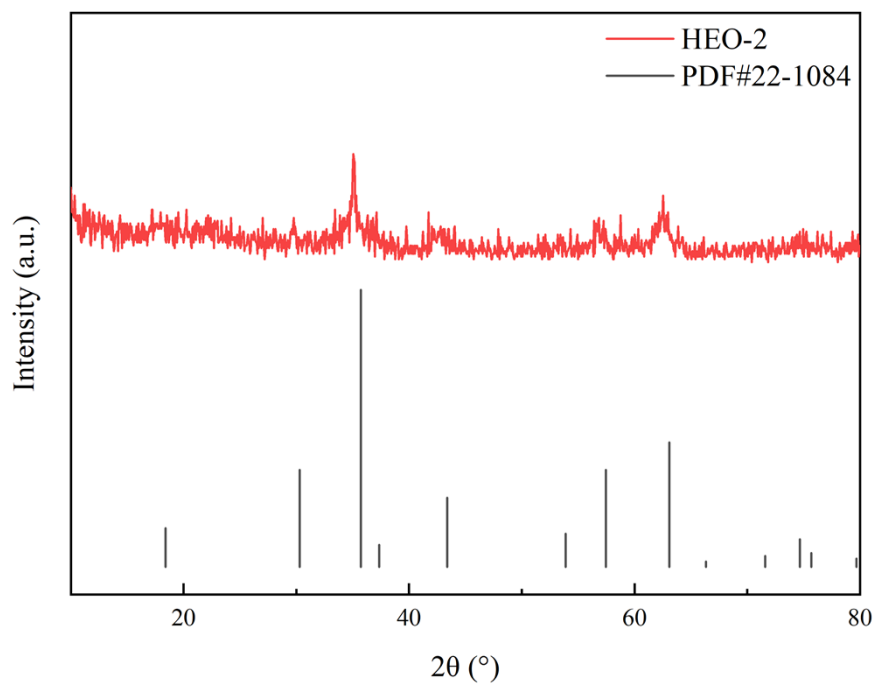

Fig. S7. XRD patterns of HEO-2 after 5,000 cycles.

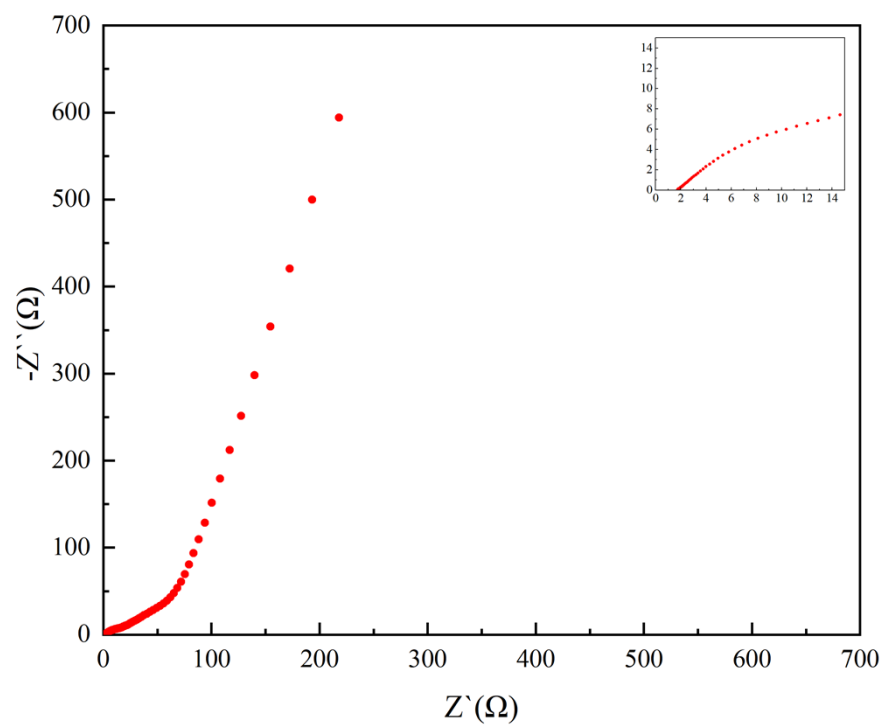

Fig. S8. Nyquist plot of HEO-2 after 5,000 cycles.

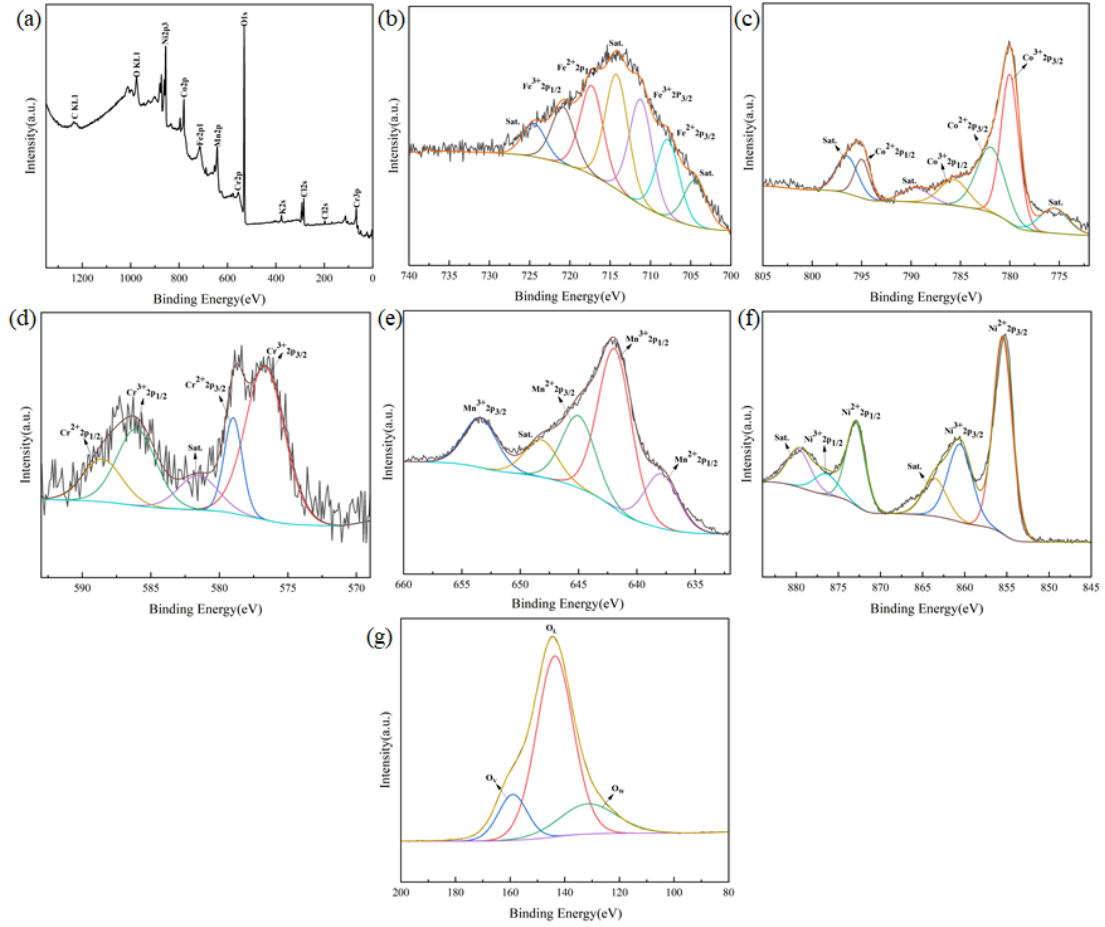

Fig. S9. XPS spectra of HEO-2 after 5,000 cycles. (a) Full spectrum; (b) Fe 2p; (c) Co 2p; (d) Cr 2p; (e) Mn 2p; (f) Ni 2p; (g) O 1s.

Tab. S1. EIS data after equivalent circuit fitting.

| Samples | $R_s$ ( $\Omega$ ) | $R_{ct}$ ( $\Omega$ ) | $CPE-P$ | $W$ ( $\Omega$ ) |
|---------|--------------------|-----------------------|---------|------------------|
| HEO-1   | 1.736              | 1.815                 | 0.69225 | 0.53972          |
| HEO-2   | 1.77               | 11.8                  | 0.59535 | 0.29583          |
| HEO-3   | 0.27427            | 5.16                  | 0.97168 | 0.52345          |
| HEO-4   | 1.766              | 1.133                 | 0.5483  | 0.6925           |

Tab. S2. EIS data after equivalent circuit fitting of HEO-2 after 5,000 cycles.

| Samples | $R_s$ ( $\Omega$ ) | $R_{ct}$ ( $\Omega$ ) | $CPE-P$ | $W$ ( $\Omega$ ) |
|---------|--------------------|-----------------------|---------|------------------|
| HEO-2   | 1.8                | 14.39                 | 0.66122 | 0.41444          |

Tab. S3. Energy density comparison of various high entropy ceramic materials.

| Materials                                                                                                    | Electrolyte | Window of potential | Capacitance                                      | Energy density             | References |
|--------------------------------------------------------------------------------------------------------------|-------------|---------------------|--------------------------------------------------|----------------------------|------------|
| (CrMoVZrNb)N                                                                                                 | 1 M KOH     | (-1, 0)             | 78 F g <sup>-1</sup> at 100 mV s <sup>-1</sup>   | 10.8 W h kg <sup>-1</sup>  | [14]       |
| (CoCrFeMnNi) <sub>3</sub> O <sub>4</sub>                                                                     | 2 M KOH     | (0, 0.45)           | 239 F g <sup>-1</sup> at 0.5 A g <sup>-1</sup>   | 6.7 W h kg <sup>-1</sup>   | [15]       |
| (FeCoCrMnMg) <sub>3</sub> O <sub>4</sub>                                                                     | 1 M KOH     | (0.2, 0.55)         | 193.7 F g <sup>-1</sup> at 1 A g <sup>-1</sup>   | 3.3 W h kg <sup>-1</sup>   | [16]       |
| La(Co <sub>0.2</sub> Cr <sub>0.2</sub> Fe <sub>0.2</sub> Mn <sub>0.2</sub> Ni <sub>0.2</sub> )O <sub>3</sub> | 1 M KOH     | (0, 0.5)            | 154.8 F g <sup>-1</sup> at 1 A g <sup>-1</sup>   | 5.4 W h kg <sup>-1</sup>   | [17]       |
| (FeCoCrMnZn) <sub>3</sub> O <sub>4</sub>                                                                     | 1 M KOH     | (0, 0.5)            | 340.3 F g <sup>-1</sup> at 1 A g <sup>-1</sup>   | 11.8 W h kg <sup>-1</sup>  | [18]       |
| (FeCoCrMnNi) <sub>3</sub> O <sub>4</sub>                                                                     | 1 M KOH     | (-1, 0.6)           | 332.2 F g <sup>-1</sup> at 0.3 A g <sup>-1</sup> | 103.8 W h kg <sup>-1</sup> | This work  |
